# Supplementary material
Source: PubMed Central journal article supplement (PMC2794974)

## Supplemental Figure 1

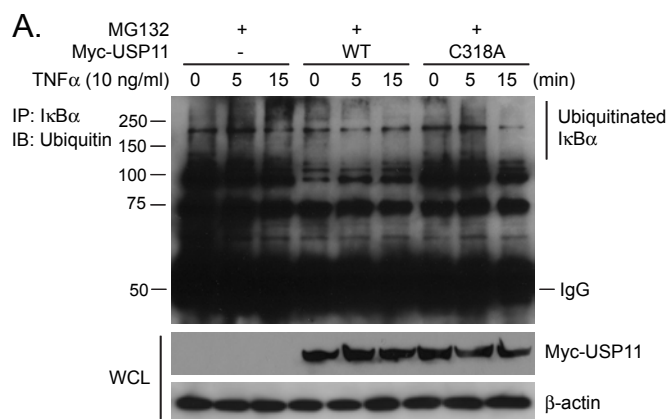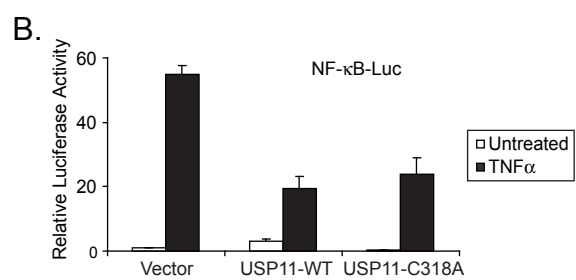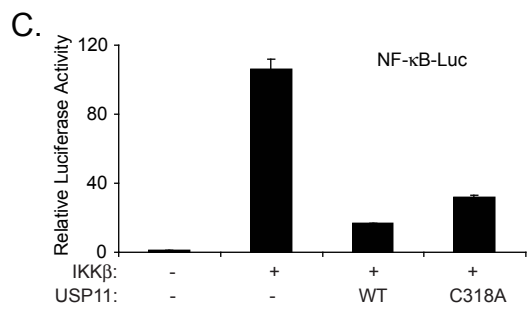

Supplement: NIHMS155575-supplement-01.pdf [file NIHMS155575-supplement-01.pdf]
